# Supplementary material for: N7-methylguanosine-based signature for tumor subtyping and prognosis and immunotherapy prediction of stomach cancer
Source: Research Square preprint supplement (doi:10.21203/rs.3.rs-5424379/v1), 2024-12-17
Supplement: Supplementary file 1 [file d7488a565d9bbd11df45c16c.xlsx]

## Sheet: Sheet1
DCP2
DCPS
NUDT1
NUDT10
NUDT11
NUDT16
NUDT16L1
NUDT3
NUDT4
NUDT4B
NUDT5
NUDT7
AGO2
CYFIP1
CYFIP2
DCPS
EIF4E
EIF4E1B
EIF4E2
EIF4E3
GEMIN5
LARP1
NCBP1
NCBP2
NCBP3
AGO2
CYFIP1
CYFIP2
DCPS
EIF3D
EIF4A1
EIF4E
EIF4E1B
EIF4E2
EIF4E3
EIF4G3
GEMIN5
IFIT5
LARP1
LSM1
NCBP1
NCBP2
NCBP2L
NCBP3
SNUPN
